# Supplementary material for: Concurrent tDCS-fMRI after stroke reveals link between attention network organization and motor improvement
Source: PubMed Central journal article supplement — Sci Rep. 2024 Aug 20;14:19334. doi: 10.1038/s41598-024-70083-5 (PMC11336178; doi:10.1038/s41598-024-70083-5), 2024-08-20
Supplement: 41598_2024_70083_MOESM1_ESM.pdf [file 41598_2024_70083_MOESM1_ESM.pdf]

# Supplementary Figure 1

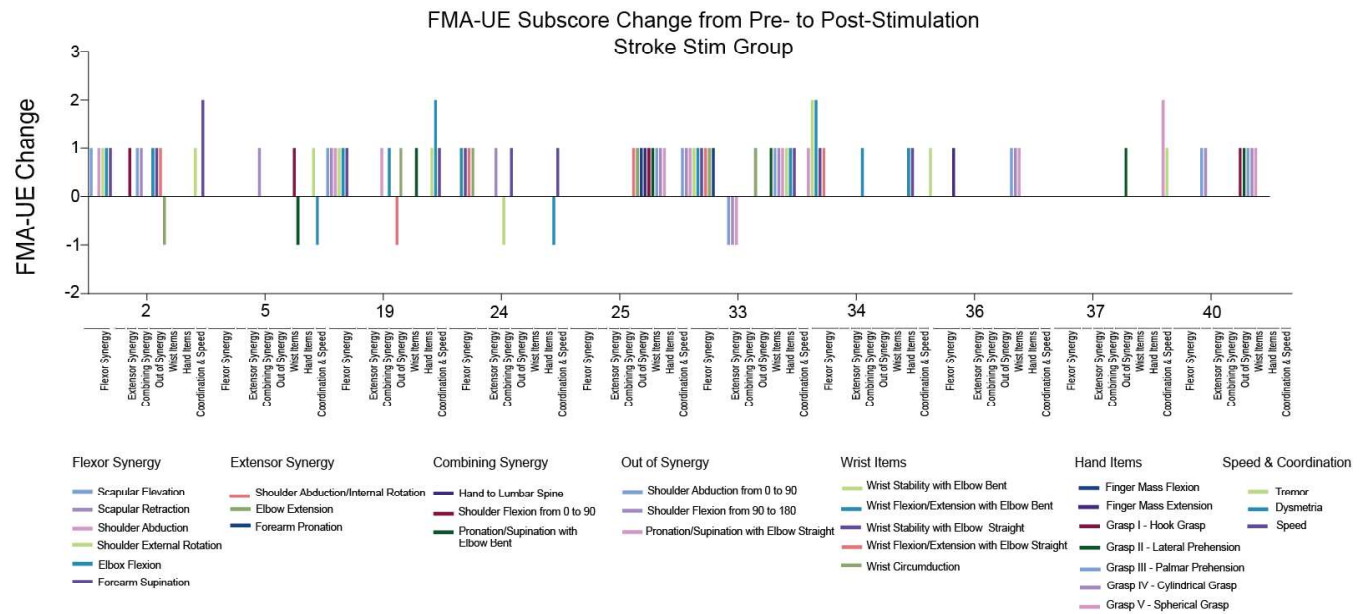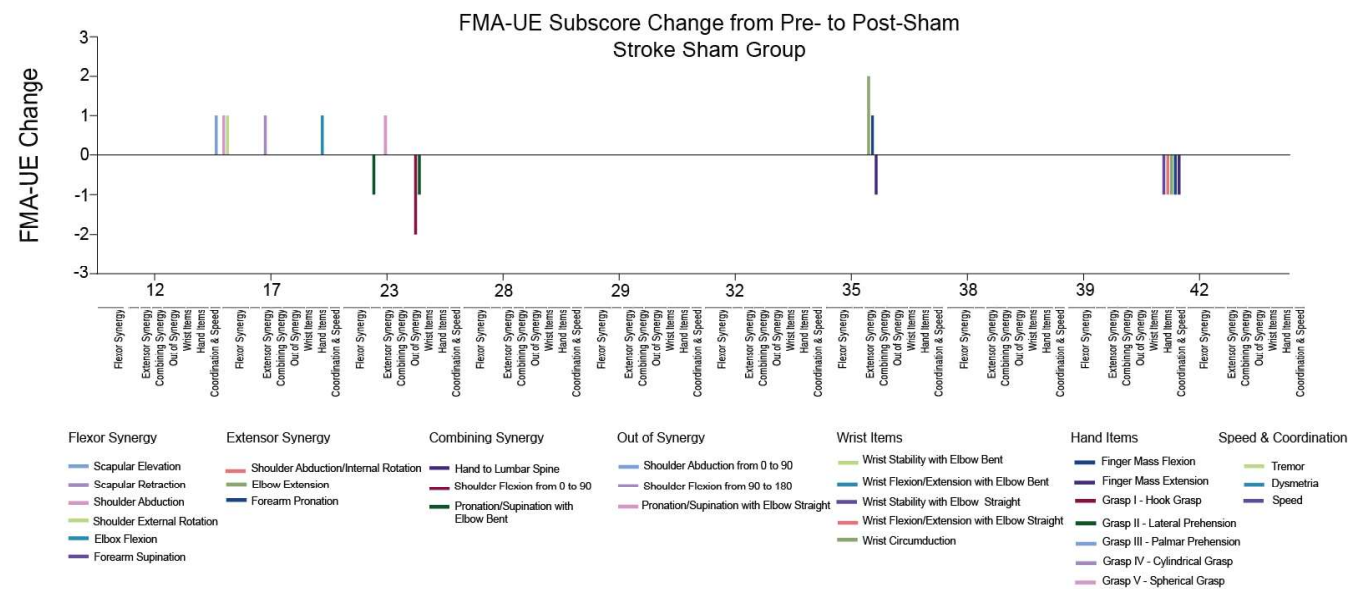

Supplementary Figure 2

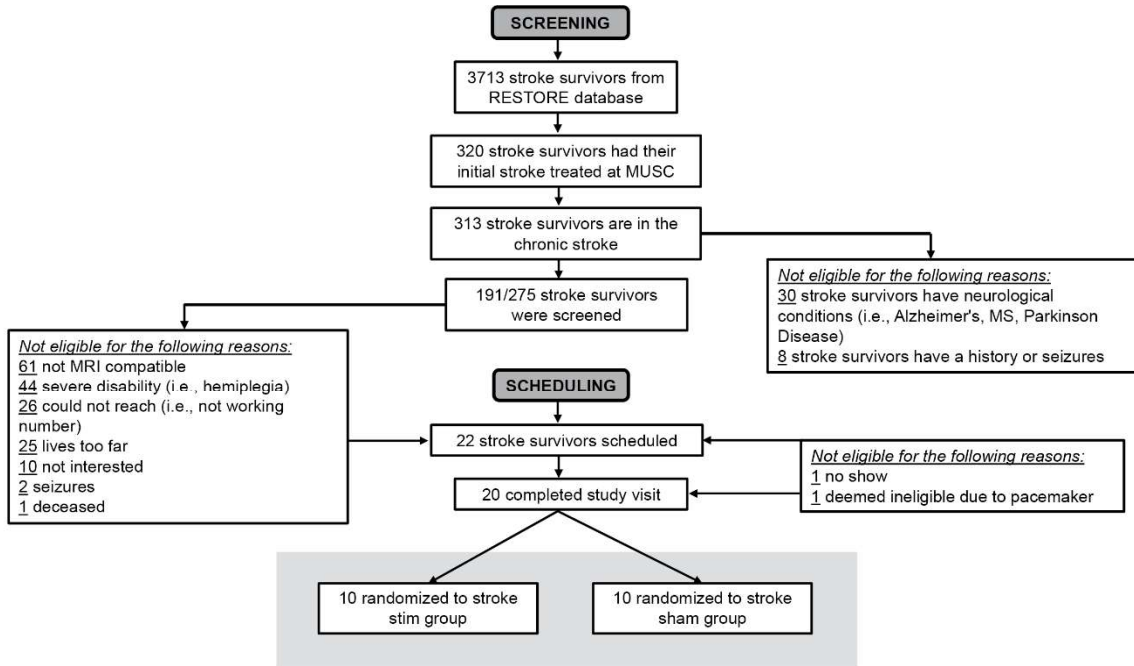

### Supplementary Figure 3

Mean Connectivity Matrices for Chronic Stroke Subjects

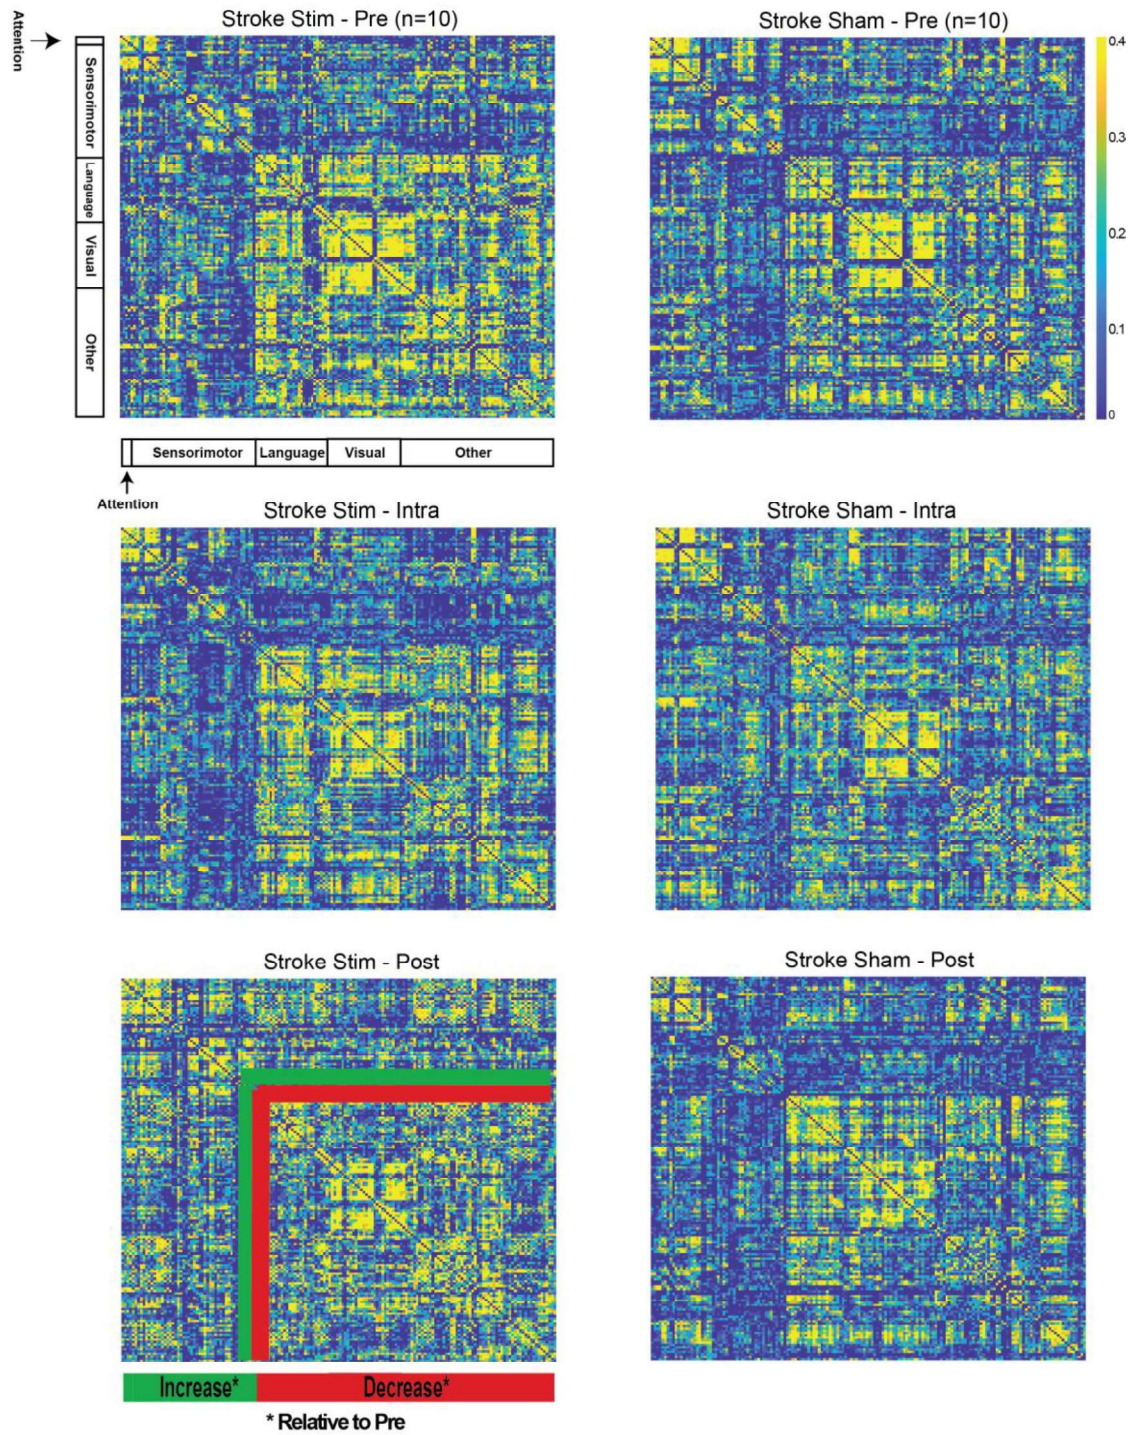

# Supplementary Figure 4

Change in Mean Connectivity Matrices for Chronic Stroke Subjects (Post-Pre)

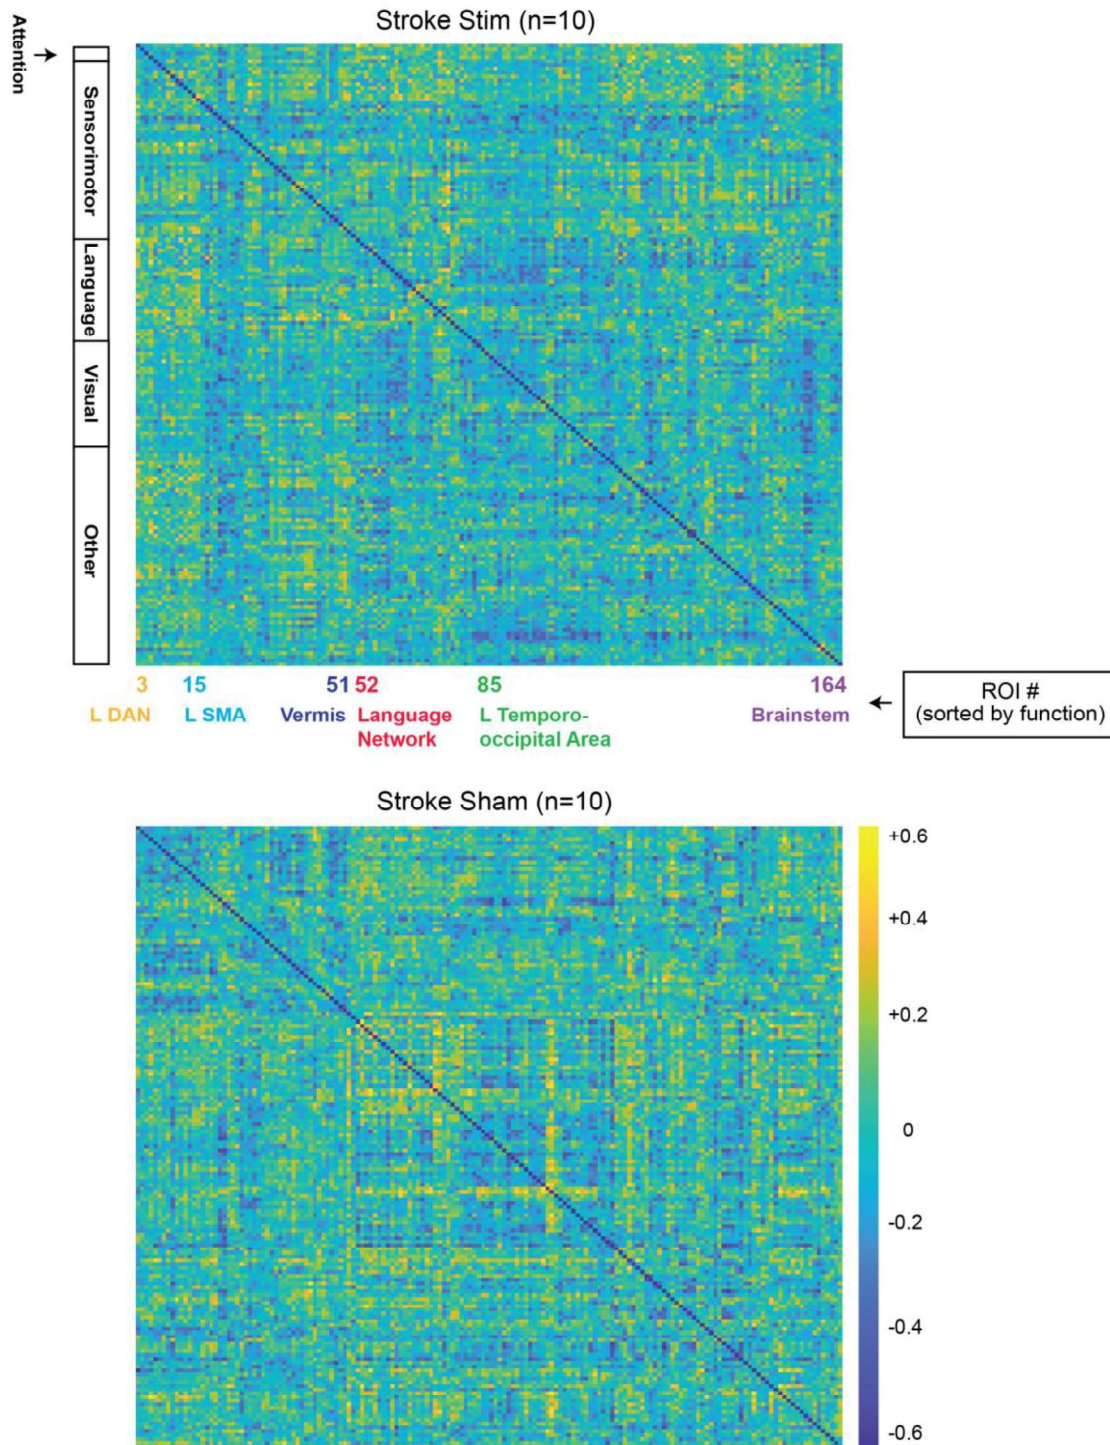

# Supplementary Figure 5

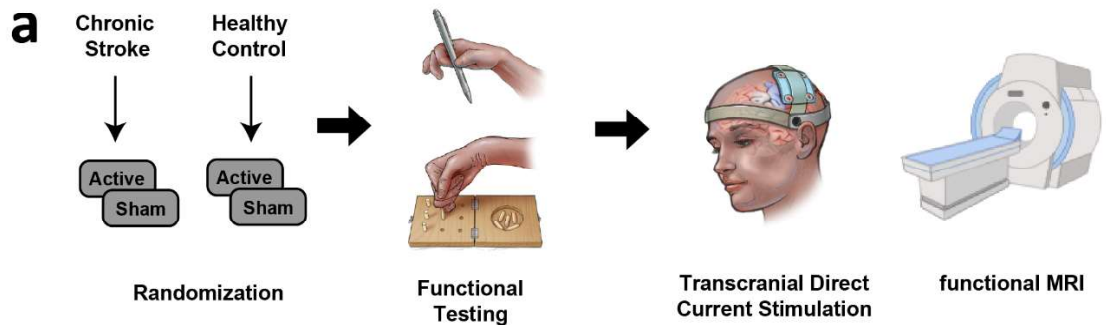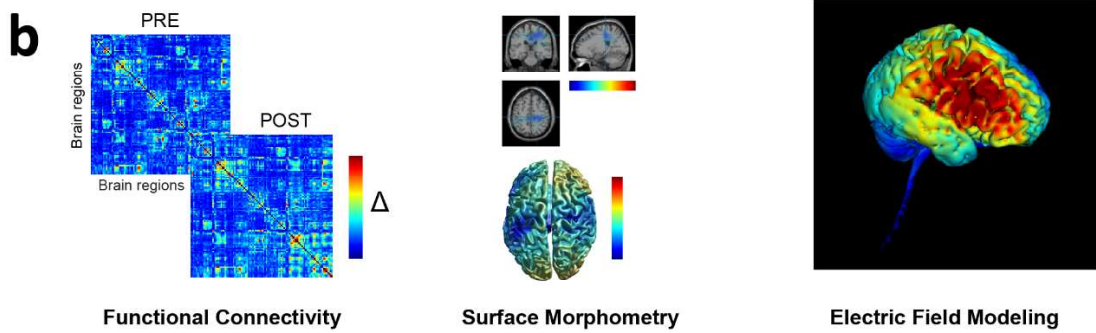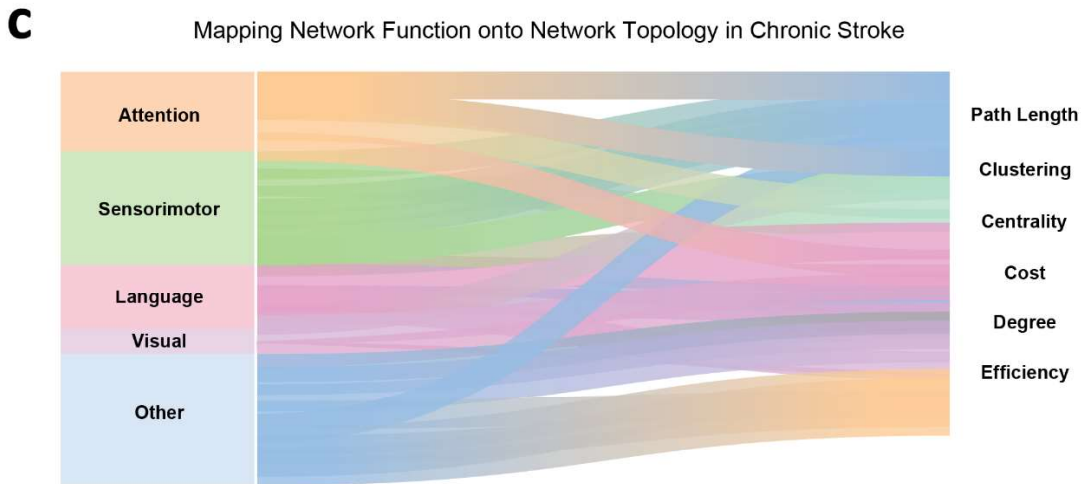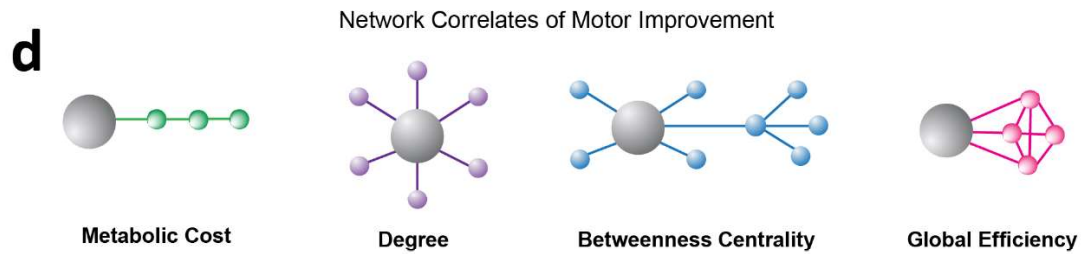

## Supplementary Table 1

### Harvard -Oxford and Automated Anatomical Labeling Atlases for all groups

| Region                                                                                           |
|--------------------------------------------------------------------------------------------------|
| ROI 1 = networks.DorsalAttention.FEF (L)                                                         |
| ROI 2 = networks.DorsalAttention.FEF (R)                                                         |
| ROI 3 = networks.DorsalAttention.IPS (L)                                                         |
| ROI 4 = networks.DorsalAttention.IPS (R)                                                         |
| ROI 5 = networks.SensoriMotor.Lateral (L)                                                        |
| ROI 6 = networks.SensoriMotor.Lateral (R)                                                        |
| ROI 7 = networks.SensoriMotor.Superior                                                           |
| ROI 8 = networks.Cerebellar.Anterior                                                             |
| ROI 9 = networks.Cerebellar.Posterior                                                            |
| ROI 10 = atlas.PreCG r (Precentral Gyrus Right)                                                  |
| ROI 11 = atlas.PreCG l (Precentral Gyrus Left)                                                   |
| ROI 12 = atlas.PostCG r (Postcentral Gyrus Right)                                                |
| ROI 13 = atlas.PostCG l (Postcentral Gyrus Left)                                                 |
| ROI 14 = atlas.SMA r (Juxtapositional Lobule Cortex -formerly Supplementary Motor Cortex- Right) |
| ROI 15 = atlas.SMA l (Juxtapositional Lobule Cortex -formerly Supplementary Motor Cortex- Left)  |
| ROI 16 = atlas.FO r (Frontal Operculum Cortex Right)                                             |
| ROI 17 = atlas.FO l (Frontal Operculum Cortex Left)                                              |
| ROI 18 = atlas.CO r (Central Opercular Cortex Right)                                             |
| ROI 19 = atlas.CO l (Central Opercular Cortex Left)                                              |
| ROI 20 = atlas.Caudate r                                                                         |
| ROI 21 = atlas.Caudate l                                                                         |
| ROI 22 = atlas.Putamen r                                                                         |
| ROI 23 = atlas.Putamen l                                                                         |
| ROI 24 = atlas.Pallidum r                                                                        |
| ROI 25 = atlas.Pallidum l                                                                        |
| ROI 26 = atlas.Cereb1 l (Cerebellum Crus1 Left)                                                  |
| ROI 27 = atlas.Cereb1 r (Cerebellum Crus1 Right)                                                 |
| ROI 28 = atlas.Cereb2 l (Cerebellum Crus2 Left)                                                  |
| ROI 29 = atlas.Cereb2 r (Cerebellum Crus2 Right)                                                 |
| ROI 30 = atlas.Cereb3 l (Cerebellum 3 Left)                                                      |
| ROI 31 = atlas.Cereb3 r (Cerebellum 3 Right)                                                     |
| ROI 32 = atlas.Cereb45 l (Cerebellum 4 5 Left)                                                   |
| ROI 33 = atlas.Cereb45 r (Cerebellum 4 5 Right)                                                  |

ROI 34 = atlas.Cereb6 l (Cerebellum 6 Left)  
ROI 35 = atlas.Cereb6 r (Cerebellum 6 Right)  
ROI 36 = atlas.Cereb7 l (Cerebellum 7b Left)  
ROI 37 = atlas.Cereb7 r (Cerebellum 7b Right)  
ROI 38 = atlas.Cereb8 l (Cerebellum 8 Left)  
ROI 39 = atlas.Cereb8 r (Cerebellum 8 Right)  
ROI 40 = atlas.Cereb9 l (Cerebellum 9 Left)  
ROI 41 = atlas.Cereb9 r (Cerebellum 9 Right)  
ROI 42 = atlas.Cereb10 l (Cerebellum 10 Left)  
ROI 43 = atlas.Cereb10 r (Cerebellum 10 Right)  
ROI 44 = atlas.Ver12 (Vermis 1 2)  
ROI 45 = atlas.Ver3 (Vermis 3)  
ROI 46 = atlas.Ver45 (Vermis 4 5)  
ROI 47 = atlas.Ver6 (Vermis 6)  
ROI 48 = atlas.Ver7 (Vermis 7)  
ROI 49 = atlas.Ver8 (Vermis 8)  
ROI 50 = atlas.Ver9 (Vermis 9)  
ROI 51 = atlas.Ver10 (Vermis 10)  
ROI 52 = networks.Language.IFG (L)  
ROI 53 = networks.Language.IFG (R)  
ROI 54 = networks.Language.pSTG (L)  
ROI 55 = networks.Language.pSTG (R)  
ROI 56 = atlas.IFG tri r (Inferior Frontal Gyrus, pars triangularis Right)  
ROI 57 = atlas.IFG tri l (Inferior Frontal Gyrus, pars triangularis Left)ROI =  
ROI 58 = atlas.IFG oper r (Inferior Frontal Gyrus, pars opercularis Right)  
ROI 59 = atlas.IFG oper l (Inferior Frontal Gyrus, pars opercularis Left)  
ROI 60 = atlas.aSTG r (Superior Temporal Gyrus, anterior division Right)  
ROI 61 = atlas.aSTG l (Superior Temporal Gyrus, anterior division Left)  
ROI 62 = atlas.pSTG r (Superior Temporal Gyrus, posterior division Right)  
ROI 63 = atlas.pSTG l (Superior Temporal Gyrus, posterior division Left)  
ROI 64 = atlas.aMTG r (Middle Temporal Gyrus, anterior division Right)  
ROI 65 = atlas.aMTG l (Middle Temporal Gyrus, anterior division Left)  
ROI 66 = atlas.pMTG r (Middle Temporal Gyrus, posterior division Right)  
ROI 67 = atlas.pMTG l (Middle Temporal Gyrus, posterior division Left)  
ROI 68 = atlas.toMTG r (Middle Temporal Gyrus, temporooccipital part Right)  
ROI 69 = atlas.toMTG l (Middle Temporal Gyrus, temporooccipital part Left)  
ROI 70 = atlas.aITG r (Inferior Temporal Gyrus, anterior division Right)

ROI 71 = atlas.aITG l (Inferior Temporal Gyrus, anterior division Left)  
ROI 72 = atlas.pITG r (Inferior Temporal Gyrus, posterior division Right)  
ROI 73 = atlas.pITG l (Inferior Temporal Gyrus, posterior division Left)  
ROI 74 = atlas.aSMG r (Supramarginal Gyrus, anterior division Right)  
ROI 75 = atlas.aSMG l (Supramarginal Gyrus, anterior division Left)  
ROI 76 = atlas.pSMG r (Supramarginal Gyrus, posterior division Right)  
ROI 77 = atlas.pSMG l (Supramarginal Gyrus, posterior division Left)  
ROI 78 = atlas.AG r (Angular Gyrus Right)  
ROI 79 = atlas.AG l (Angular Gyrus Left)  
ROI 80 = networks.Visual.Medial  
ROI 81 = networks.Visual.Occipital  
ROI 82 = networks.Visual.Lateral (L)  
ROI 83 = networks.Visual.Lateral (R)  
ROI 84 = atlas.toITG r (Inferior Temporal Gyrus, temporooccipital part Right)  
ROI 85 = atlas.toITG l (Inferior Temporal Gyrus, temporooccipital part Left)  
ROI 86 = atlas.sLOC r (Lateral Occipital Cortex, superior division Right)  
ROI 87 = atlas.sLOC l (Lateral Occipital Cortex, superior division Left)  
ROI 88 = atlas.iLOC r (Lateral Occipital Cortex, inferior division Right)  
ROI 89 = atlas.iLOC l (Lateral Occipital Cortex, inferior division Left)  
ROI 90 = atlas.ICC r (Intracalcarine Cortex Right)  
ROI 91 = atlas.ICC l (Intracalcarine Cortex Left)  
ROI 92 = atlas.Cuneal r (Cuneal Cortex Right)  
ROI 93 = atlas.Cuneal l (Cuneal Cortex Left)  
ROI 94 = atlas.LG r (Lingual Gyrus Right)  
ROI 95 = atlas.LG l (Lingual Gyrus Left)  
ROI 96 = atlas.aTFusC r (Temporal Fusiform Cortex, anterior division Right)  
ROI 97 = atlas.aTFusC l (Temporal Fusiform Cortex, anterior division Left)  
ROI 98 = atlas.pTFusC r (Temporal Fusiform Cortex, posterior division Right)  
ROI 99 = atlas.pTFusC l (Temporal Fusiform Cortex, posterior division Left)  
ROI 100 = atlas.TOFusC r (Temporal Occipital Fusiform Cortex Right)  
ROI 101 = atlas.TOFusC l (Temporal Occipital Fusiform Cortex Left)  
ROI 102 = atlas.OFusG r (Occipital Fusiform Gyrus Right)  
ROI 103 = atlas.OFusG l (Occipital Fusiform Gyrus Left)  
ROI 104 = atlas.SCC r (Supracalcarine Cortex Right)  
ROI 105 = atlas.SCC l (Supracalcarine Cortex Left)  
ROI 106 = atlas.OP r (Occipital Pole Right)  
ROI 107 = atlas.OP l (Occipital Pole Left)



ROI 108 = networks.DefaultMode.MPFC  
ROI 109 = networks.DefaultMode.LP (L)  
ROI 110 = networks.DefaultMode.LP (R)  
ROI 111 = networks.DefaultMode.PCC  
ROI 112 = networks.Salience.ACC  
ROI 113 = networks.Salience.AInsula (L)  
ROI 114 = networks.Salience.AInsula (R)  
ROI 115 = networks.Salience.RPFC (L)  
ROI 116 = networks.Salience.RPFC (R)  
ROI 117 = networks.Salience.SMG (L)  
ROI 118 = networks.Salience.SMG (R)  
ROI 119 = networks.FrontoParietal.LPFC (L)  
ROI 120 = networks.FrontoParietal.PPC (L)  
ROI 121 = networks.FrontoParietal.LPFC (R)  
ROI 122 = networks.FrontoParietal.PPC (R)  
ROI 123 = atlas.FP r (Frontal Pole Right)  
ROI 124 = atlas.FP l (Frontal Pole Left)  
ROI 125 = atlas.IC r (Insular Cortex Right)  
ROI 126 = atlas.IC l (Insular Cortex Left)  
ROI 127 = atlas.SFG r (Superior Frontal Gyrus Right)  
ROI 128 = atlas.SFG l (Superior Frontal Gyrus Left)  
ROI 129 = atlas.MidFG r (Middle Frontal Gyrus Right)  
ROI 130 = atlas.MidFG l (Middle Frontal Gyrus Left)  
ROI 131 = atlas.TP r (Temporal Pole Right)  
ROI 132 = atlas.TP l (Temporal Pole Left)  
ROI 133 = atlas.SPL r (Superior Parietal Lobule Right)  
ROI 134 = atlas.SPL l (Superior Parietal Lobule Left)  
ROI 135 = atlas.MedFC (Frontal Medial Cortex)  
ROI 136 = atlas.SubCalC (Subcallosal Cortex)  
ROI 137 = atlas.PaCiG r (Paracingulate Gyrus Right)  
ROI 138 = atlas.PaCiG l (Paracingulate Gyrus Left)  
ROI 139 = atlas.AC (Cingulate Gyrus, anterior division)  
ROI 140 = atlas.PC (Cingulate Gyrus, posterior division)  
ROI 141 = atlas.Precuneous (Precuneous Cortex)  
ROI 142 = atlas.FOrb r (Frontal Orbital Cortex Right)  
ROI 143 = atlas.FOrb l (Frontal Orbital Cortex Left)  
ROI 144 = atlas.aPaHC r (Parahippocampal Gyrus, anterior division Right)

ROI 145 = atlas.aPaHC l (Parahippocampal Gyrus, anterior division Left)  
ROI 146 = atlas.pPaHC r (Parahippocampal Gyrus, posterior division Right)  
ROI 147 = atlas.pPaHC l (Parahippocampal Gyrus, posterior division Left)  
ROI 148 = atlas.PO r (Parietal Operculum Cortex Right)  
ROI 149 = atlas.PO l (Parietal Operculum Cortex Left)  
ROI 150 = atlas.PP r (Planum Polare Right)  
ROI 151 = atlas.PP l (Planum Polare Left)  
ROI 152 = atlas.HG r (Heschl's Gyrus Right)  
ROI 153 = atlas.HG l (Heschl's Gyrus Left)  
ROI 154 = atlas.PT r (Planum Temporale Right)  
ROI 155 = atlas.PT l (Planum Temporale Left)  
ROI 156 = atlas.Thalamus r  
ROI 157 = atlas.Thalamus  
ROI 158 = atlas.Hippocampus r  
ROI 159 = atlas.Hippocampus l  
ROI 160 = atlas.Amygdala r  
ROI 161 = atlas.Amygdala l  
ROI 162 = atlas.Accumbens r  
ROI 163 = atlas.Accumbens l  
ROI 164 = atlas.Brain-Stem

Supplementary Table 2

Supplementary Table 1. Mean Connectivity

| Mean Connectivity Across Timepoints for Stroke Stim Group | Post hoc p-value                                                       | FDR-corrected p-value   | Timepoint                    |
|-----------------------------------------------------------|------------------------------------------------------------------------|-------------------------|------------------------------|
| left supplementary motor area                             | ↑ $p=0.0029$ , $t_{[18]} = 3.463$<br>↑ $p=0.0336$ , $t_{[18]} = 2.300$ | <b>0.0297</b><br>0.4442 | Pre to post<br>Intra to post |
| left inferior frontal gyrus, pars triangularis            | ↓ $p=0.0058$ , $t_{[18]} = 3.629$                                      | <b>0.0303</b>           | Pre to post                  |
| left inferior frontal gyrus, pars opercularis             | ↓ $p=0.0396$ , $t_{[18]} = 2.770$                                      | 0.1371                  | Pre to post                  |
| left inferior temporal gyrus, temporo-occipital           | ↓ $p=0.0095$ , $t_{[18]} = 3.404$                                      | 0.2514                  | Intra to post                |

Note: Significance defined as p-values less than or equal to 0.05.

### Supplementary Table 3

**Supplementary Table 2. Surface-Based Morphometry**

| Mean whole-brain cortical thickness between Healthy Control and Chronic Stroke groups | P-value                      | FDR-corrected p-value |
|---------------------------------------------------------------------------------------|------------------------------|-----------------------|
| superior frontal gyrus                                                                | p=0.0267, $t_{[38]} = 2.306$ | p=0.167               |
| IFG pars opercularis                                                                  | p=0.0004, $t_{[38]} = 3.896$ | p=0.004               |
| precentral gyrus                                                                      | p=0.0278, $t_{[38]} = 2.288$ | p=0.168               |
| pericalcarine                                                                         | p=0.0003, $t_{[38]} = 3.990$ | p=0.004               |
| paracentral gyrus                                                                     | p=0.0003, $t_{[38]} = 4.013$ | p=0.004               |

*Note:* t-tests were used to assess differences in cortical thickness across specific brain regions using the Desikan- Killiany atlas. The following ROIs revealed to be statistically different, with healthy controls showing larger cortical thickness. Significance was defined as p-values less than or equal to 0.05.

Supplementary Table 4

Supplementary Table 3. Graph theory and FMA linear regressions for pooled Stroke Stim and Sham groups (N=20)

| Significant left-sided ROIs                     | $\Delta$ FMA vs Pre-Post $\Delta$ in Graph Theory Metrics |         | FMA $\Delta$ vs Pre-Stimulation Graph Theory Metric |
|-------------------------------------------------|-----------------------------------------------------------|---------|-----------------------------------------------------|
| Brain Region                                    | Graph Theory Measure                                      | P-Value | P-Value                                             |
| <b>Attention Regions</b>                        |                                                           |         |                                                     |
| Dorsal Attention FEF (L)                        | Betweenness Centrality                                    | 0.043   |                                                     |
| Dorsal Attention IPS (L)                        | Betweenness Centrality                                    | 0.039   | 0.041                                               |
| Dorsal Attention IPS (L)                        | Global Efficiency                                         |         | 0.031                                               |
| Dorsal Attention IPS (L)                        | Cost                                                      |         | 0.029                                               |
| Dorsal Attention IPS (L)                        | Degree                                                    |         | 0.029                                               |
| <b>Sensorimotor Regions</b>                     |                                                           |         |                                                     |
| Putamen (L)                                     | Average Path Length                                       | 0.037   |                                                     |
| Cerebellum Crus2 (L)                            | Betweenness Centrality                                    | 0.042   |                                                     |
| Cerebellum 6 (L)                                | Average Path Length                                       | 0.002   |                                                     |
| Caudate (L)                                     | Betweenness Centrality                                    |         | 0.035                                               |
| Postcentral Gyrus (L)                           | Global Efficiency                                         | 0.027   |                                                     |
| Postcentral Gyrus (L)                           | Cost                                                      | 0.008   |                                                     |
| Postcentral Gyrus (L)                           | Average Path Length                                       | 0.031   |                                                     |
| Postcentral Gyrus (L)                           | Degree                                                    | 0.008   |                                                     |
| <b>Language Regions</b>                         |                                                           |         |                                                     |
| Language Network pSTG (L)                       | Cost                                                      | 0.004   |                                                     |
| Language Network pSTG (L)                       | Degree                                                    | 0.004   |                                                     |
| Inferior Frontal Gyrus, pars triangularis (L)   | Global Efficiency                                         | 0.024   |                                                     |
| Inferior Frontal Gyrus, pars triangularis (L)   | Local Efficiency                                          | 0.037   |                                                     |
| Inferior Frontal Gyrus, pars triangularis (L)   | Average Path Length                                       | 0.010   |                                                     |
| Inferior Frontal Gyrus, pars opercularis (L)    | Local Efficiency                                          | 0.040   |                                                     |
| <b>Visual Regions</b>                           |                                                           |         |                                                     |
| Lateral Occipital Cortex, inferior division (L) | Average Path Length                                       | 0.042   |                                                     |
| Intracalcarine Cortex (L)                       | Average Path Length                                       | 0.036   |                                                     |
| Inferior Temporal Gyrus, temporooccipital (L)   | Clustering Coefficient                                    | 0.030   |                                                     |
| <b>Other Regions</b>                            |                                                           |         |                                                     |

|                                                    |                        |       |       |
|----------------------------------------------------|------------------------|-------|-------|
| Middle Frontal Gyrus<br>Left                       | Average Path Length    | 0.029 |       |
| Inferior Temporal Gyrus,<br>posterior division (L) | Average Path Length    | 0.034 |       |
| Inferior Temporal Gyrus,<br>posterior division (L) | Average Path Length    |       | 0.043 |
| Planum Polare (L)                                  | Betweenness Centrality |       | 0.024 |
| Frontal Operculum<br>Cortex (L)                    | Local Efficiency       | 0.041 |       |
| Frontal Operculum<br>Cortex (L)                    | Clustering Coefficient | 0.040 |       |
| Accumbens (L)                                      | Global Efficiency      | 0.030 |       |
| Salience Insula (L)                                | Local Efficiency       | 0.031 |       |
| Salience Insula (L)                                | Clustering Coefficient | 0.040 |       |
